# Supplementary material for: Lipid nanoparticles for antisense oligonucleotide gene interference into brain border-associated macrophages
Source: PubMed Central journal article supplement (PMC9671215; doi:10.3389/fmolb.2022.887678), 2022-11-03
Supplement: DataSheet1.pdf [file DataSheet1.pdf]

# SUPPLEMENTARY MATERIALS

for

## Lipid nanoparticles for oligonucleotide delivery into brain border-associated macrophages to silence neuroinflammation-related genes.

M. Calero, L.H. Moleiro, A. Sayd, Y. Dorca, L. Miquel-Rio, V. Paz, J. Robledo-Montaña, E. Enciso, F. Acción, D. Herráez-Aguilar, T. Hellweg, L. Sánchez, A. Bortolozzi, J.C. Leza, B. García-Bueno\* and F. Monroy\*

\* Corresponding authors: [bgbueno@med.ucm.es](mailto:bgbueno@med.ucm.es); [monroy@quim.ucm.es](mailto:monroy@quim.ucm.es)

### Table of Contents:

**Supplementary Figure S1. Stability control by 1H-NMR spectroscopy check for covalent stability in the synthesized compound DSPE-PEG-MAN as obtained by click-chemistry mannosylation of the succinimide ligand DSPE-PE-NHS.**

**Supplementary Figure S2A. Catalogue of GapmeR-based lipid nanoparticles (GR@LNPs). Type A) Compact GR-DChol archetype; Type B) Stratified core-shell population**

**Supplementary Figure S2B. GR@LNPs' catalogue (cont.). Type C) Hollow, non-complexed with GapmeR @LNPs**

**Supplementary Figure S3. Ultrastructural analysis of the TEM images in terms of the inhomogenous lamellar structure factor.**

**Supplementary Table T1. Best fit parameters from TEM-ultrastructural analysis performed in terms of the inhomogenous lamellar structure factor.**

[Source data Fig. 12.](#)

**Supplementary Figure S1. Stability control by 1H-NMR spectroscopy check for covalent stability in the synthesized compound DSPE-PEG-MAN as obtained by click-chemistry mannosylation of the succinimide ligand DSPE-PE-NHS (1H-NMR samples dissolved in deuterated chloroform).**

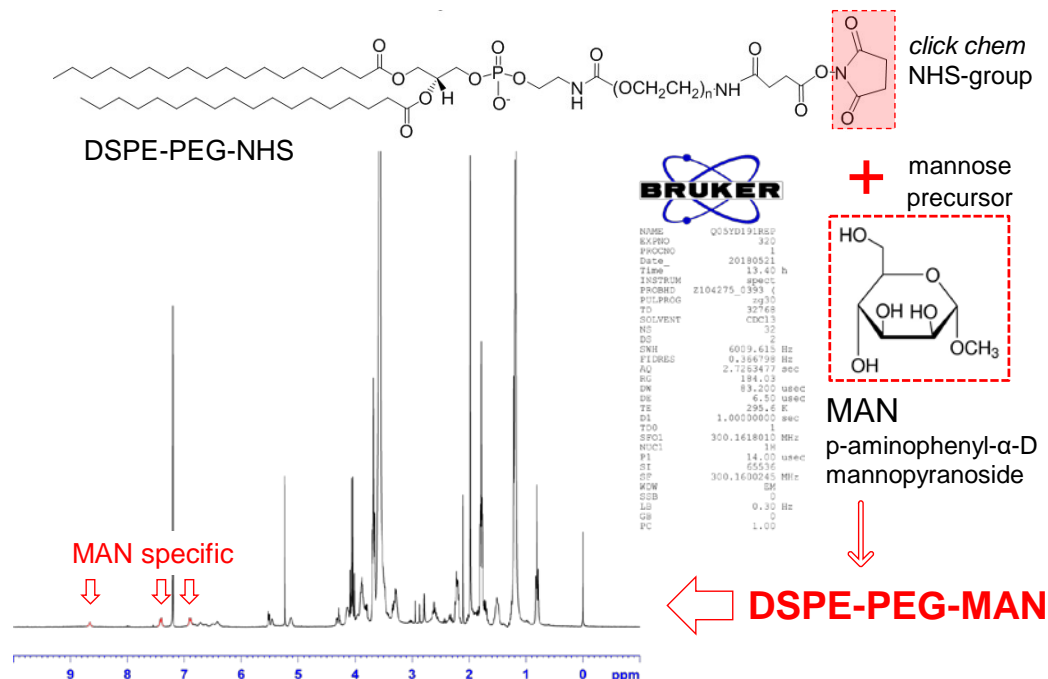

**Supplementary Figure S1.** Click-chemistry synthesis for the mannosylation reaction used to obtain DSPE-PEG-MAN (covalently reacting moieties framed in red). The proton magnetic resonance spectrum was obtained three months after synthesis of the mannosylated lipid DSPE-PEG-MAN; *inset*) conditions for used RMN sequence. The MAN-specific signals detected after binding p-aminophenyl-α-D mannopyranoside to the pegylated lipid are marked in red. See main text for an interpretation.

**GR@LNP (pellet)**

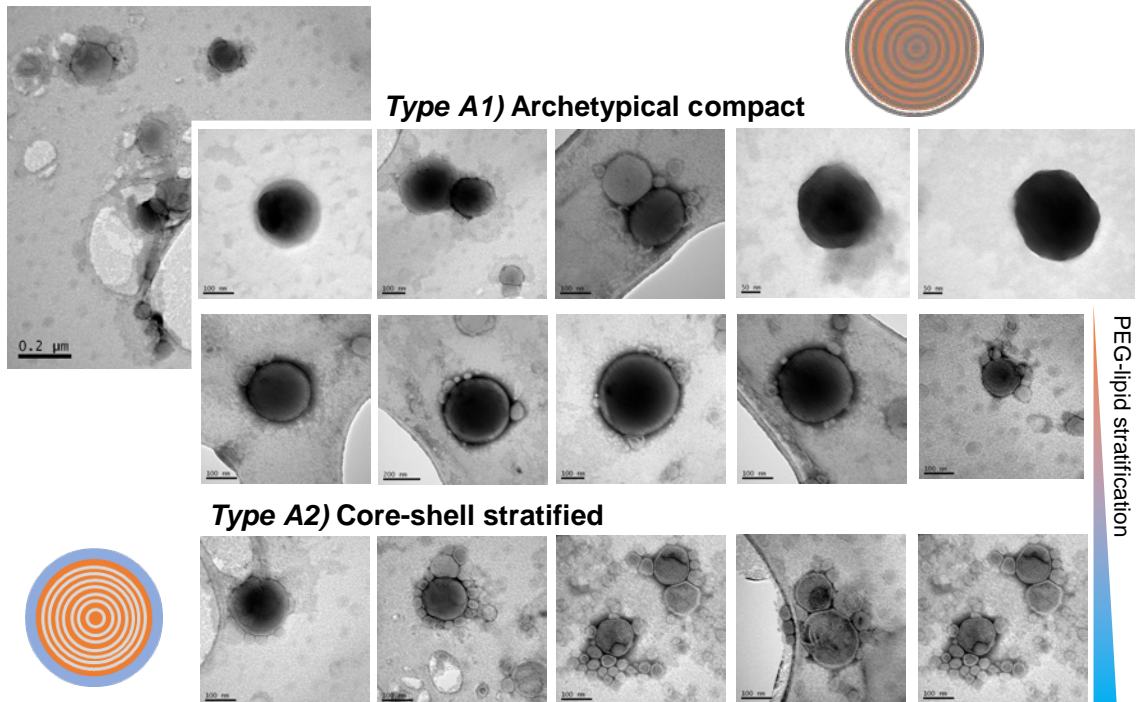

**Supplementary Figure S2A. GapeR based lipid nanoparticles (GR@LNPs) catalogue. Type A1) Compact GR-DChol archetype; Type A2) Stratified core-shell population with swollen corona (in-shell stratified pegylated lipids)**

**Type B1) non-complexed @LNPs(compact NPs)**

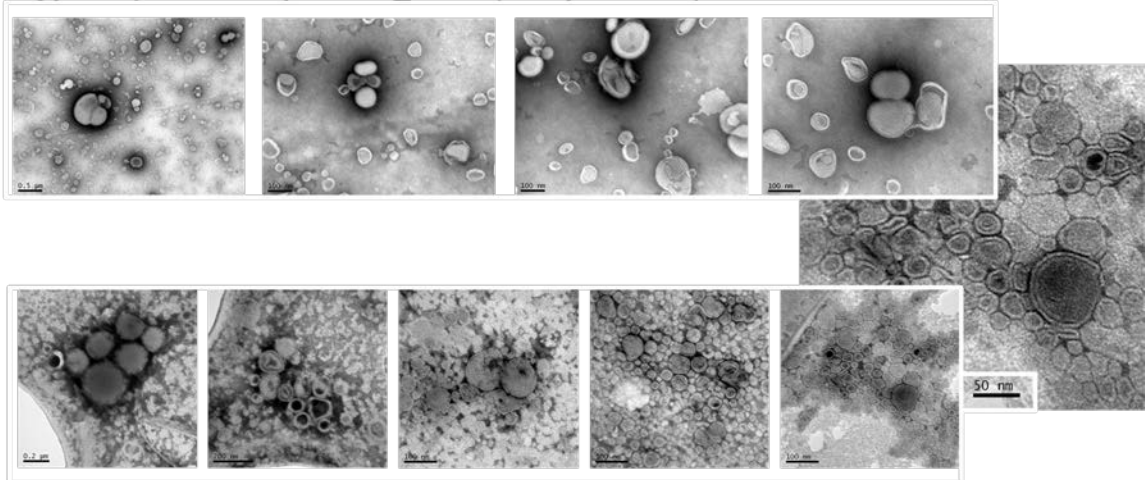

**Type B2) oligolamellar**

**Supplementary Figure S2B. GapeR based lipid nanoparticles (GR@LNPs) catalogue. Type B1) Hollow, non-complexed nanoparticles devoid of the GapeR component (hollow @LNPs). This typeclass of hollow particles was found in the synthesis supernatants (without evidence of electrodense GR); they were stratified in two subtypes: Type B2) Multilamellar lipid nanoparticle; Subtype B2: oligolamellar, mainly unilamellar liposomes.**

**Supplementary Figure S3. Ultrastructural profiling analysis of the TEM images in terms of the inhomogeneous lamellar structure factor (in terms of the radial distance  $r$ ; expressed in nanometers):**

$$S(r) = S_0 e^{-kr} \sin[\pi r / D(1 + \delta r) + \phi]^\alpha$$

**Structural lamellarity parameters:**

- $S_0$  structural amplitude (in arbitrary units).
- $k$  radial decay factor (in  $\text{nm}^{-1}$ )
- $D$  equivalent wavelength describing the total interlamellar spacing (repetition distance; in nm)
- $\delta$  dilatation factor describing core-shell lamellar expansion along the radial direction (dimensionless quantity, relative to the bare wavelength  $D$ ).
- $\phi$  phase factor (arbitrary; relative to the initial position of the radial profile).

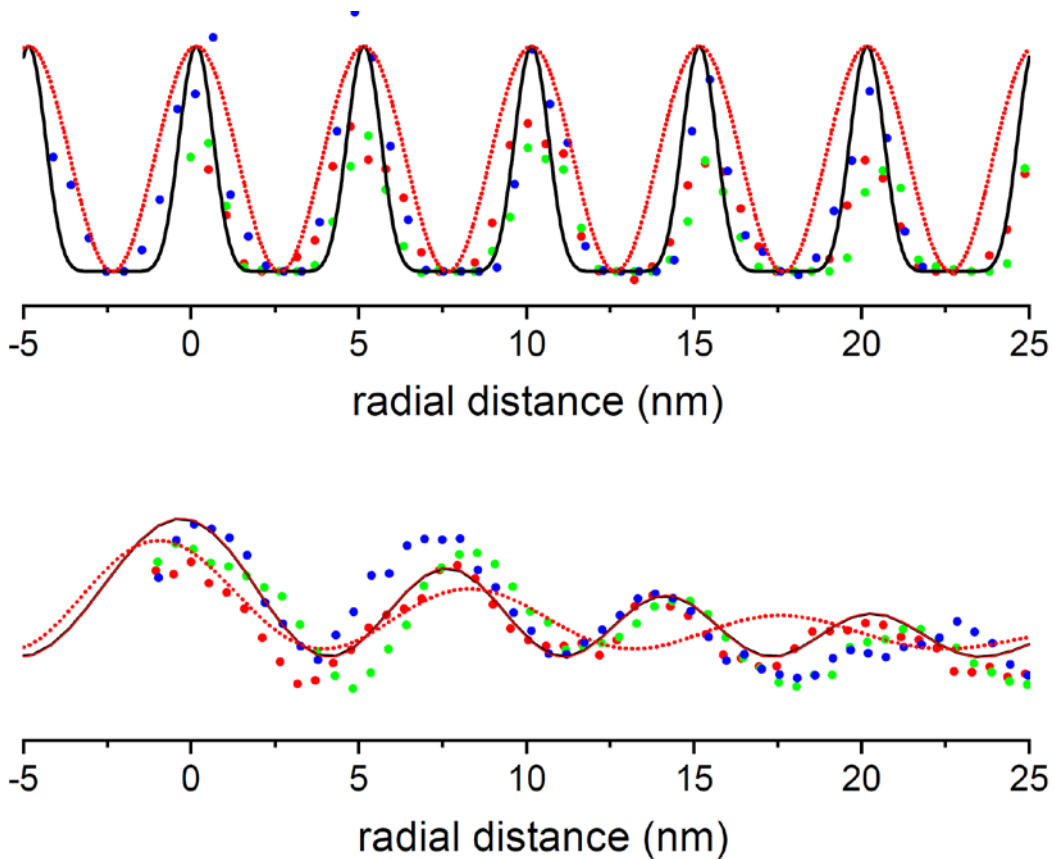

**Legend for Fittings. Symbols:** experimental intensity profiles as segmented along radial directions in the real nanoparticles (for details, see Fig. 8 in the main text and discussion therein). **Lines:** Best fit to the homogeneous layered model ( $\alpha = 2$ ; dashed line); two-layered alternate model ( $\alpha = 8$ ; straight line).

**Supplementary Table T1. Best fit parameters from TEM-ultrastructural analysis performed in terms of the inhomogenous lamellar structure factor.**

$$S(r) = S_0 e^{-kr} \sin[\pi r/D(1 + \delta r) + \phi]^\alpha$$

| Type               | $S_0$       | $k(nm^{-1})$   | $D(nm)$     | $10^3 \delta(nm^{-1})$ | $\phi(rad)$ | $\alpha$ |
|--------------------|-------------|----------------|-------------|------------------------|-------------|----------|
| <b>A1</b>          | 2.11 ± 0.16 | 0.016 ± 0.006  | 5.02 ± 0.06 | 20 ± 10                | 1.47 ± 0.03 | 8        |
| <b>A2</b>          | 1.28 ± 0.11 | 0.020 ± 0.006  | 5.36 ± 0.08 | -14 ± 3                | 1.54 ± 0.05 | 8        |
| <b>A3</b>          | 1.55 ± 0.17 | 0.027 ± 0.007  | 5.83 ± 0.08 | -28 ± 3                | 1.95 ± 0.05 | 8        |
| <b>A (average)</b> | 2.47 ± 0.15 | 0.02 ± 0.01    | 5.4 ± 0.1   | -7 ± 10                |             | 8        |
| <b>B1</b>          | 0.54 ± 0.04 | 0.05 ± 0.01    | 7.8 ± 0.4   | 40 ± 15                | 1.62 ± 0.09 | 2        |
| <b>B2</b>          | 0.71 ± 0.05 | 0.06 ± 0.01    | 7.6 ± 0.3   | 24 ± 10                | 1.26 ± 0.07 | 2        |
| <b>B3</b>          | 0.86 ± 0.05 | 0.07 ± 0.01    | 6.7 ± 0.3   | 14 ± 10                | 1.31 ± 0.07 | 2        |
| <b>B (average)</b> | 0.78 ± 0.05 | 0.06 ± 0.01    | 7.3 ± 0.3   | 28 ± 12                |             | 2        |
| <b>C1</b>          | 0.17 ± 0.03 | -0.02 ± 0.01   | 6.3 ± 0.4   | 10 ± 20                | 0.6 ± 0.2   | 2        |
| <b>C2</b>          | 0.17 ± 0.04 | -0.004 ± 0.02  | 4.7 ± 0.4   | 37 ± 13                | 2.5 ± 0.3   | 2        |
| <b>C3</b>          | 0.41 ± 0.06 | 0.034 ± 0.01   | 4.6 ± 0.3   | 26 ± 15                | 0.0 ± 0.1   | 2        |
| <b>C (average)</b> | 0.25 ± 0.04 | -0.003 ± 0.013 | 5.2 ± 0.4   | 24 ± 14                |             | 2        |

**Source data Fig. 12.**

|              | Film 1      |              | Film 2      |              | Promedio films 1+ 2 |              |           |
|--------------|-------------|--------------|-------------|--------------|---------------------|--------------|-----------|
|              | Medial Mean | Lateral Mean | Medial Mean | Lateral Mean | Medial Mean         | Lateral Mean |           |
| <b>Rat 1</b> | 100,51      | 115,17       | 102,48      | 113,80       | 101,495             | 114,485      | CONTROL   |
| <b>Rat 2</b> | 101,72      | 102,57       | 95,03       | 118,40       | 98,375              | 110,485      | CONTROL   |
| <b>Rat 3</b> | 99,05       | 101,83       | 97,11       | 113,15       | 98,08               | 107,49       | CONTROL   |
| <b>Rat 4</b> | 89,07       | 88,37        | 89,25       | 80,16        | 89,16               | 84,265       | GAPMER    |
| <b>Rat 5</b> | 79,87       | 85,86        | 71,60       | 88,54        | 75,735              | 87,2         | GAPMER    |
| <b>Rat 6</b> | 56,52       | 65,86        | 54,72       | 60,11        | 55,62               | 62,985       | GAPMER    |
| <b>Rat 7</b> | 95,50       | 96,82        | 112,42      | 90,99        | 103,96              | 93,905       | NON-SENSE |
| <b>Rat 8</b> | 107,63      | 107,76       | 109,98      | 107,63       | 108,805             | 107,695      | NON-SENSE |
| <b>Rat 9</b> | 81,23       | 92,29        | 90,86       | 99,73        | 86,045              | 96,01        | NON-SENSE |
